# Supplementary material
Source: HighWire-hosted journal article supplement (http://pharmrev.aspetjournals.org/highwire/filestream/23578/field_highwire_adjunct_files/1/269_supp_table_1.xlsx)
Supplement: 269_supp_table_1.xlsx [file 269_supp_table_1.xlsx]

## Sheet: Gene List
Gene
GNAS
GNAL
ADCY1
ADCY2
ADCY3
ADCY4
ADCY5
ADCY6
ADCY7
ADCY8
ADCY9
ADCY10
PRKACA
PRKACB
PRKACG
PRKX
PRKAR2A
PRKAR1B
PRKAR2B
PRKAR1A
PDE4A
PDE4B
PDE4C
PDE4D
AKAP1
AKAP2
AKAP3
AKAP4
AKAP5
AKAP6
AKAP7
AKAP8
AKAP9
AKAP10
AKAP11
AKAP12
AKAP13
AKAP14
GSKIP
C2orf88
SPHKAP
PDE8B
PDE11A

## Sheet: GTEX_tissue_medianTPM
Gene	Adipose (average)	Adrenal Gland	Artery - Aorta	Artery - Coronary	Artery - Tibial	Bladder	Brain - Amygdala	Brain - Anterior cingulate cortex (BA24)	Brain - Caudate (basal ganglia)	Brain - Cerebellar Hemisphere	Brain - Cerebellum	Brain - Cortex	Brain - Frontal Cortex (BA9)	Brain - Hippocampus	Brain - Hypothalamus	Brain - Nucleus accumbens (basal ganglia)	Brain - Putamen (basal ganglia)	Brain - Spinal cord (cervical c-1)	Brain - Substantia nigra	Breast - Mammary Tissue	Cells - Cultured fibroblasts	Cells - EBV-transformed lymphocytes	Cervix - Ectocervix	Cervix - Endocervix	Colon - Sigmoid	Colon - Transverse	Esophagus - Gastroesophageal Junction	Esophagus - Mucosa	Esophagus - Muscularis	Fallopian Tube	Heart - Atrial Appendage	Heart - Left Ventricle	Kidney - Cortex	Kidney - Medulla	Liver	Lung	Minor Salivary Gland	Muscle - Skeletal	Nerve - Tibial	Ovary	Pancreas	Pituitary	Prostate	Skin - Not Sun Exposed (Suprapubic)	Skin - Sun Exposed (Lower leg)	Small Intestine - Terminal Ileum	Spleen	Stomach	Testis
ADCY1	2.453	0.91525	0.58085	2.1155	2.182	0.8846	11.645	30.13	9.038	67.23	58.93	42.87	48.81	10.55	4.839	5.381	7.891	2.783	4.926	2.062	0.1432	0.42545	4.871	4.7885	0.4879	0.38825	0.9571	0.3255	0.8774	3.776	1.64	1.037	1.364	1.242	12.905	0.91575	0.303	1.449	2.624	1.113	1.1905	3.676	2.03	0.36475	0.5279	0.3532	2.284	0.8515	3.8
ADCY10	0.1465	0.1243	0.16035	0.1558	0.139	0.1376	0.09948	0.1439	0.11945	0.5595	0.5414	0.2061	0.1904	0.1252	0.1261	0.1693	0.09489	0.1112	0.09063	0.1394	0.057775	0.026245	0.1702	0.1298	0.1455	0.1352	0.168	0.03738	0.1634	0.1719	0.05978	0.05475	0.1217	0.201915	1.733	0.1449	0.079505	0.06332	0.176	0.11335	0.039475	0.128	0.3021	0.07997	0.0901	0.1762	0.1316	0.1433	18.15
ADCY2	1.22835	0.5731	4.3685	1.5265	2.446	2.415	22.885	33.085	20.365	7.539	11.99	33.03	36.27	14.27	14.385	16.54	15.64	12.25	17.17	2.277	0.0257	0.03371	5.744	3.3875	5.082	1.8885	3.558	0.3787	3.997	5.314	0.253	0.05479	0.1361	0.2022	0.01087	0.47065	1.6995	24.76	2.683	4.574	0.1361	10.68	7.319	4.7115	5.627	0.7544	0.1517	1.331	4.245
ADCY3	64.665	8.2485	29.665	32.3	42.02	28.19	7.498	9.675	16.05	27.71	30.49	17.14	14.11	7.133	11.03	16.31	11.07	10.81	8.446	56.58	47.005	54.445	54.54	60.075	18.17	15.66	29.11	18.08	27.74	62.59	10.82	7.1435	5.552	12.062	1.2675	35.55	15.025	4.782	108.3	60.47	4.2045	25.62	27.42	23.535	28.43	23.12	16.72	11	8.023
ADCY4	69.94	8.6145	12.645	32.345	13.67	27.77	2.572	2.3275	3.026	3.004	5.107	4.929	3	2.702	3.0705	2.465	3.075	4.433	4.294	71.22	1.86	0.51785	66.84	64.79	17.35	13.56	31.96	13.64	29.36	61.95	17.8	19.795	19.03	33.415	2.289	52.01	16.685	8.12	45.4	11.58	3.932	8.776	29.54	16.595	18.7	17.75	43.59	12.22	6.628
ADCY5	19.435	2.623	71.72	66.63	96.75	40.43	19.09	24.945	66.125	6.428	7.314	27.2	26.71	16.03	20.48	73.2	54.61	24.45	16.28	11.91	0.2066	0.1529	19.12	22.175	56.34	19.48	129.7	7.115	122.9	22.6	45.4	39.79	4.597	14.3	1.8795	6.918	5.5995	1.706	11.84	22.605	3.8765	25.89	29.82	1.9125	3.344	9.784	8.713	8.147	16.58
ADCY6	52.01	23.325	71.38	66.17	53.97	30.24	7.3155	10.255	7.2245	38.75	48.15	18.44	14.3	8.086	12.695	6.3225	6.009	8.632	7.964	48.08	28.955	3.716	55.62	57.75	30.86	43.055	32.58	19.06	30	39.64	45.34	43.31	19.02	35.67	9.0465	33.635	32.06	9.792	60.66	55.805	15.68	33.75	38.75	17.005	20.07	32.65	10.93	35.8	12.13
ADCY7	5.157	2.7295	6.9645	5.6045	3.29	3.258	1.1365	0.97515	0.8088	0.2269	0.2663	1.481	1.51	0.7811	1.7805	0.6003	0.5297	2.897	1.862	3.014	26.65	31.28	3.279	2.674	2.774	3.635	4.103	10.08	3.532	4.541	3.022	0.8335	0.8255	0.5975	0.75195	16.965	4.097	0.5393	7.481	16.36	0.80445	2.181	2.181	6.8515	7.896	6.976	18.37	2.123	1.211
ADCY8	0.012553	0.007284	0	0	0	0	5.3765	5.5595	3.904	7.839	7.468	5.459	5.466	4.551	5.147	3.503	2.347	3.893	5.64	0.04384	0.044555	0	0.09208	0.076795	0.008978	0	0.06763	0	0.02338	1.274	0.01711	0.00312	0.02956	0.02828	0	0.10455	0.04695	0.02957	0.1159	0.0090455	0	0.0169	0.01178	1.3655	2.155	0.01271	0	0.0134	0.9501
ADCY9	10.8145	8.3635	40.33	26.325	34.57	17.32	3.9045	5.621	7.2035	15.18	15.73	8.385	8.529	4.373	3.891	7.1925	5.247	2.609	3.08	11.44	15.44	0.36035	15.37	20.685	14.77	11.84	20.28	6.815	19.97	19.33	9.057	10.38	6.052	5.522	8.0295	23.03	9.6315	31.12	20.14	19.62	8.288	10.14	8.388	8.19	9.869	10.92	6.215	5.405	8.456
AKAP1	40.385	17.415	104.3	71.59	127.3	64.65	16.515	18.295	23.295	47.66	49.33	24.37	23.46	13.26	14.47	22.155	17.42	14.48	14.62	53.49	16.825	26.165	40.49	41.21	108.4	80.63	104	33.37	94.04	59.51	44.26	43.645	14.75	19.62	27.685	29.81	29.78	73.01	33.28	32.57	11.75	27.9	56.54	36.005	38.04	56.89	16.44	51.49	196.2
AKAP10	18.42	16.295	19.29	19.855	22.32	20.28	7.6835	10.185	9.4505	19.42	17.92	12.64	13.59	7.455	9.1225	10.2	7.778	11.5	8.921	18.04	21.63	20.41	22.87	23.515	19.35	13.16	18.36	13.4	18.5	21.82	6.34	4.0425	7.548	11.195	5.389	20.025	13.8	4.971	24.39	22.35	5.455	13.66	19.3	15.38	16.03	15.53	24.45	13.54	22.54
AKAP11	17.04	13.71	19.565	21.155	26.97	22.11	15.63	22.355	20.69	38.54	30.76	20.27	31.52	14.82	19.455	29.185	15.7	29.22	14.98	17.62	29.65	44.095	28.97	28.595	20.35	12.875	16.73	11.39	17.24	24.35	8.174	4.137	6.016	7.248	4.0475	17.99	13.31	4.671	30.62	23.69	4.7305	20.5	14.9	12.3	12.67	15.04	12.91	9.116	21.99
AKAP12	123.1	11.645	64.875	96.195	106.6	53.53	20.47	34.73	22.665	121.9	103.3	31	36.91	10.83	36.67	22.585	17.14	13.15	17.17	78.17	83.74	0.25485	48.02	46.17	101.4	48.94	51.34	9.274	42.6	82.84	35.98	6.468	21.51	20.925	3.7465	66.18	9.4375	6.761	114.9	152.4	2.82	41.64	38.4	10.675	14.5	22.68	21.89	14.19	118.9
AKAP13	25.96	11.1	28.26	28.255	25.54	32.28	2.2255	3.0445	3.375	0.922	1.395	4.264	4.182	2.346	3.918	4.9305	2.339	3.249	3.34	24.28	17.655	35.785	30.14	32.005	19.15	18.105	27.5	17.26	32.85	24.62	26.13	22.68	5.424	8.7485	6.9205	57.585	20.425	18.48	33.52	27.82	13.015	18.21	20.23	21.085	22.72	27.22	30.43	18.59	20.9
AKAP14	0	0	0	0	0	0.04839	0.97105	0.38155	0.2621	0.5239	0.4917	0.2938	0.2781	0.5106	1.452	0.2353	0.1061	0.1574	0.2805	0.0192	0	0.04124	0.05261	0.1436	0.05711	0.0434	0.03474	0	0.03989	1.185	0	0	0	0	0	0.71165	0	0	0.07157	0.05432	0	0.2781	0.05213	0	0.0258	0.06871	0.02702	0	66.09
AKAP2	98.43	11.945	92.69	82.02	103.3	40.28	6.7585	8.153	7.4325	4.366	6.339	8.815	12.43	8.787	11.65	6.3765	7.534	8.975	11.01	75.01	196.6	88.49	37.28	41.92	46.38	25.15	42.08	7.776	45.74	53.7	41.12	35.26	14.8	25.11	11.225	114.35	16.03	7.619	41.94	14.78	3.258	9.423	19.07	15.885	22.71	30.49	33.03	17.96	5.175
AKAP3	0.4177	0.9751	0.44605	0.6213	0.4861	0.794	0.8801	0.68675	0.87175	0.6583	0.7531	0.8019	0.794	0.9291	0.97285	0.7438	0.8331	2.752	1.471	0.6499	0.6473	1.086	0.6607	0.756	0.634	0.56245	0.62	0.5541	0.6053	0.7763	2.679	0.49685	0.7877	2.0355	0.38165	0.5965	0.80155	0.3357	1.118	0.6708	0.9311	2.03	0.9903	0.67905	0.6786	0.6216	0.6808	0.6263	184.4
AKAP4	0.01236	0.02685	0	0	0	0.02681	0	0	0	0	0.02478	0	0	0	0	0	0	0	0	0	0	0	0.08904	0	0	0.01538	0	0.0215	0.01847	0.05067	0	0	0.02144	0.01255	0.01679	0.02971	0.02426	0	0	0.03428	0.015435	0.02931	0.03386	0	0	0.01734	0.02203	0.01296	478
AKAP5	0.46455	0.231	2.0295	1.598	1.308	0.7086	4.5835	5.932	9.796	3.196	2.663	6.287	9.674	3.317	0.8225	19.4	5.606	0.3536	0.3752	0.4602	0.32845	3.9275	0.7908	0.94105	0.7451	1.387	0.9882	0.2627	0.8159	0.9439	0.1759	0.1087	0.4851	0.8953	0.3349	1.5745	0.38465	0.1365	0.6592	0.57585	0.1355	1.461	0.6634	0.4326	0.4179	1.623	1.038	0.3212	0.5483
AKAP6	0.84295	0.8476	14.38	10.375	18.03	4.95	8.2175	12.895	7.849	10.83	9.817	13.64	17.93	7.719	10.92	7.809	6.478	10.1	11.17	0.7885	0.14705	0.16645	1.309	1.565	5.304	1.726	6.434	0.9748	5.146	3.053	7.229	10.195	0.4553	0.9504	0.3137	1.8415	2.0025	12.79	1.666	1.61	0.1372	4.02	0.8967	0.45545	0.6921	0.7349	0.307	0.4648	2.983
AKAP7	5.812	35.72	3.841	4.466	5.137	7.691	7.4575	7.8395	6.1535	12.98	14.64	7.638	8.386	6.17	7.724	6.403	4.803	5.919	5.777	6.104	4.211	1.222	6.359	5.9465	6.934	6.2995	4.62	2.541	4.745	7.658	2.816	1.863	2.799	3.153	7.491	5.488	3.903	4.708	7.72	11.205	13.625	4.363	8.136	2.362	2.84	5.703	5.823	3.284	8.46
AKAP8	34.12	24.025	28.125	29.18	38.18	38.41	7.6705	9.1525	10.71	32.56	32.56	14.18	13.38	7.871	9.1315	9.544	8.782	10.37	7.864	37.85	28.855	33.075	48.5	47.95	33.47	28.165	31.15	25.62	29.27	45.55	12.31	9.966	14.24	20.075	12.925	33.165	27.225	21.71	45.24	43.85	12.57	28	36.6	35.73	38.98	33.79	43.78	22.48	31.1
AKAP9	12.555	12.635	12.03	11.71	12.87	11.74	2.944	3.255	4.2565	18.85	22.25	6.043	4.582	3.094	4.527	5.0445	3.095	5.312	3.532	15.45	11.145	13.4	17.22	16.825	13.02	14.07	14.11	12.56	11.84	17.47	5.45	4.533	5.514	6.1485	8.1545	16.46	16.65	9.739	21.29	25.245	7.9735	20.76	14.58	17.375	16.76	16.93	11.44	12.1	9.736
C2orf88	2.1525	3.729	4.33	3.304	1.686	3.568	3.268	1.9045	3.0265	2.109	2.511	1.941	2.002	4.274	4.052	2.695	2.522	10.22	4.863	3.182	1.3865	4.3575	15.24	17.67	7.229	12.07	4.383	1.465	5.452	5.456	5.302	3.8605	2.101	3.0565	0.9379	2.3395	3.674	3.703	29.03	2.2265	3.8835	2.654	5.317	2.6785	3.178	9.802	2.916	2.795	25.49
GNAL	4.916	1.13	7.558	5.7765	8.577	12.92	9.5975	10.064	28.88	3.523	4.737	9.22	11.17	5.813	7.7765	45.645	21.65	2.999	5.412	4.48	0.5722	0.70875	7.62	7.28	7.73	3.3675	5.504	4.068	6.102	4.629	1.83	0.5675	1.739	1.8085	0.6635	3.1745	4.0955	3.777	7.248	3.5605	0.67425	18.9	6.916	6.463	7.336	2.734	2.578	1.572	4.768
GNAS	215.5	230.05	339.7	261.35	306.9	191.9	281.85	361.45	123.05	474.1	368.3	356.6	501.2	229.8	548.6	143.2	111.7	241.9	212.8	203.8	244.85	234.5	275.8	263.4	219.6	139.85	223.2	159.3	216.8	210.2	194.8	174.9	109.6	174.65	56.13	224.3	423.85	263.9	189.3	236.8	88.205	1324	181.9	116.45	122.4	130.5	154.2	125.2	118.2
GSKIP	8.345	8.544	11.255	10.775	12.08	10.56	8.2845	11.055	11.845	8.071	6.636	8.768	14.98	8.989	9.7555	17.03	9.584	13.16	7.866	7.984	15.445	18.935	8.868	8.7975	9.798	20.055	7.216	28.62	7.995	7.586	3.732	2.943	6.668	10.074	7.1035	8.3375	10.165	3.254	9.935	5.023	4.009	10.71	12.47	14.66	14.64	22.12	9.981	9.438	26.8
PDE11A	0.172095	0.18205	0.17735	0.25265	0.2563	0.06205	0.4378	0.33085	0.3668	0.09687	0.08452	0.2388	0.2877	0.4824	0.9115	0.29915	0.3524	2.991	1.21	0.6195	0.03359	0.010175	0.7817	1.2431	0.4424	0.28825	0.03994	0.008914	0.02268	0.1609	0.03983	0.1253	0.3084	0.364	1.4335	0.021945	0.5223	1.524	0.1343	0.1925	0.58715	1.575	4.567	0.08792	0.1581	0.2663	0.022	0.08815	1.753
PDE4A	17.98	6.297	21.525	14.055	10.41	14.04	9.6295	21.31	9.9725	29.75	29.59	27.51	29.48	10.9	12.13	15.76	8.261	3.917	5.857	14.34	16.43	15.56	19.65	26.005	16.17	10.68	11.78	3.44	11.22	14.29	5.565	5.924	3.93	7.3395	1.237	21.83	13.175	12.19	9.565	1.698	6.663	5.876	13.56	5.781	7.559	9.078	11.61	13.7	32.62
PDE4B	11.375	1.427	7.9635	7.063	11.96	3.741	13.72	10.71	14.81	10.71	12.7	14.68	15.58	13.8	14.88	16.35	13.48	26.68	15.75	12.1	7.3665	13.215	5.65	5.437	3.41	3.0675	3.172	1.522	3.43	3.562	8.776	1.926	1.813	3.555	1.2435	13.81	8.9045	7.344	7.658	1.46	0.39855	2.547	11.72	4.622	7.189	8.016	14.8	1.882	3.233
PDE4C	1.0465	0.31015	0.54615	3.921	5.121	1.307	0.90735	1.8605	1.0945	0.2889	0.4262	4.085	2.978	0.8292	1.1275	0.9543	1.132	0.3587	0.8007	0.6001	0.1887	0.68355	3.34	3.5635	4.34	5.7495	1.865	1.606	1.291	4.828	1.168	1.092	1.255	3.8875	0.4474	3.762	0.31995	1.164	1.431	1.798	0.3145	3.302	2.134	0.249	0.3144	2.45	2.299	4.056	3.791
PDE4D	4.69	0.43005	5.0205	6.4325	19.75	12.52	1.455	2.844	1.3965	2.424	2.898	3.027	4.135	1.464	2.6475	1.9905	1.048	2.502	1.895	3.496	8.5355	1.093	3.729	4.287	16.58	6.546	5.994	1.928	6.069	4.608	5.874	2.692	3.437	3.108	0.47115	11.025	3.3105	23.09	4.752	1.2365	0.38575	5.604	11.19	2.586	2.366	4.547	2.392	3.972	1.357
PDE8B	16.19	1.8985	30.165	5.722	15.78	4.041	13.255	19.895	15.25	6.578	6.353	19.88	22.39	10.82	17.96	16.81	14.21	7.324	10.41	8.936	1.189	0.69005	17.77	27.475	5.615	2.6085	2.061	1.832	1.492	27.94	13.26	0.68625	2.524	9.3	0.93495	6.7955	9.276	0.482	4.08	4.3895	2.653	13.92	18.15	2.0265	2.617	2.361	1.131	2.808	4.23
PRKACA	70.67	120	100.7	83.97	105.4	68.31	35.545	54.69	35.005	102.6	94.94	68.18	80.32	40.2	64.585	38.38	29.87	41.89	39.95	64.89	64.52	32.65	73.45	80.425	73.42	42.405	78.92	41.03	77.84	84.31	108.8	100.4	23.42	30.855	38.08	63.755	41.5	142.3	63.62	143.55	15.905	97.87	56.42	43.93	49.01	37.04	92.18	30.02	90.72
PRKACB	9.698	8.318	21.395	21.285	30.31	24.32	44.14	55.32	47.87	130.4	84.48	57.06	103.2	45.24	69.82	73.645	36.9	74.92	44.69	9.68	12.84	7.5425	18.19	16.09	22.17	21.375	18.29	5.43	20.19	16.13	7.562	4.426	5.975	8.4105	3.6435	8.6875	16.015	2.376	9.544	10.78	3.5905	29.71	14.89	3.355	3.751	14.64	16.74	17.61	5.107
PRKACG	0	0	0	0	0	0	0	0	0	0.02967	0.03065	0	0	0	0	0	0	0	0	0	0	0	0	0	0	0	0	0	0	0	0	0	0	0	0	0	0	0	0	0	0	0	0	0	0	0	0	0	59.85
PRKAR1A	125.75	94.375	138.55	127.1	152.6	96.58	61.855	76.255	60.77	123.3	81.05	60.59	112.5	59.01	91.56	72.47	49.74	126.2	71.08	113.5	123.9	106.65	120.9	129	86.44	50.055	84.74	67.15	82.4	118.1	112.6	96.915	43.75	63.63	36.635	121.2	77.82	103.1	118	151.55	19.255	105.2	77.65	68.86	74.5	52.7	71.42	50.07	86.31
PRKAR1B	11	5.8735	11.885	14.15	6.591	11.38	75.925	165.25	57.915	132.1	126.3	277	297.4	88.31	128.25	99.275	45.93	26.75	38.91	13.51	9.7865	12.915	23.22	25.855	19.71	13.85	17.57	9.99	18.22	20.38	9.053	5.4625	9.129	11.34	5.0615	14.435	6.5485	1.961	10.19	36.29	2.331	41.79	14.46	7.7675	7.662	11.36	23.93	8.061	18.58
PRKAR2A	20.175	22.42	25.16	25.55	33.78	22.48	5.4595	6.265	4.801	14.7	12.69	6.605	8.575	5.227	8.9895	4.941	4.111	8.934	6.499	19.19	29.57	16.16	19.25	19.58	21.85	19.09	21.83	22.14	23.01	23.68	11.59	10.495	9.054	10.0235	9.1215	19.09	16.42	48.22	22.56	19.67	7.0735	13.98	19	19.06	20.19	16.44	11.99	13.96	46.6
PRKAR2B	95.96	56.02	3.4385	8.414	6.649	38.93	15.155	24.705	28.37	16.43	11.08	24.36	43.06	13.59	17.225	31.98	21.19	8.764	11.57	49.11	1.605	0.13265	17.79	18.55	17.22	12.22	56.64	5.965	56.45	14.17	13.23	5.3495	3.957	7.7745	1.179	13.98	13.785	0.8729	19.66	51.325	3.551	20.72	14.92	3.4605	5.466	14.33	20.23	8.717	30.36
PRKX	7.898	1.306	5.007	6.7325	4.266	4.73	3.9905	3.663	2.873	2.229	2.783	3.538	3.211	3.784	7.0335	2.9925	2.004	8.609	8.482	8.316	8.5725	25.185	8.068	9.9015	4.274	6.738	3.983	19.86	3.731	11.64	2.079	1.8845	5.975	21.88	1.1865	17.13	9.9875	1.074	20.02	8.5375	2.6335	3.422	7.508	14.34	12.78	9.193	16.69	3.806	13.81
SPHKAP	0.01157	0.012045	0.086505	0.092555	0.495	0.04307	3.6575	6.193	1.647	78.3	61.4	2.918	5.833	12.61	4.9835	1.3555	2.127	1.18	0.8484	0.04536	0	0.0092845	0.07094	0.04308	0.1237	0.07903	0.1314	0.004546	0.161	0.07007	7.767	11.76	0.01159	0.0122925	0.003665	0.069615	0.009304	0.007279	0.03745	1.1745	0.0083035	0.0607	0.02378	0.039595	0.07807	0.02865	0.2392	0.02863	0.4456
[truncated: 4 more columns]

## Sheet: Tissue Groups
Description	Description Curated
Adipose - Subcutaneous	Adipose
Adipose - Visceral (Omentum)	Adipose
Adrenal Gland	Adrenal
Artery - Aorta	Artery
Artery - Coronary	Artery
Artery - Tibial	Artery
Bladder	Bladder
Brain - Amygdala	Brain
Brain - Anterior cingulate cortex (BA24)	Brain
Brain - Caudate (basal ganglia)	Brain
Brain - Cerebellar Hemisphere	Brain
Brain - Cerebellum	Brain
Brain - Cortex	Brain
Brain - Frontal Cortex (BA9)	Brain
Brain - Hippocampus	Brain
Brain - Hypothalamus	Brain
Brain - Nucleus accumbens (basal ganglia)	Brain
Brain - Putamen (basal ganglia)	Brain
Brain - Spinal cord (cervical c-1)	Brain
Brain - Substantia nigra	Brain
Breast - Mammary Tissue	Breast
Cells - Cultured fibroblasts	Cells
Cells - EBV-transformed lymphocytes	Cells
Cervix - Ectocervix	Cervix
Cervix - Endocervix	Cervix
Colon - Sigmoid	Colon
Colon - Transverse	Colon
Esophagus - Gastroesophageal Junction	Esophagus
Esophagus - Mucosa	Esophagus
Esophagus - Muscularis	Esophagus
Fallopian Tube	Fallopian Tube
Heart - Atrial Appendage	Heart
Heart - Left Ventricle	Heart
Kidney - Cortex	Kidney
Kidney - Medulla	Kidney
Liver	Liver
Lung	Lung
Minor Salivary Gland	Salivary Gland
Muscle - Skeletal	Skeletal Muscle
Nerve - Tibial	Nerve
Ovary	Ovary
Pancreas	Pancreas
Pituitary	Pituitary
Prostate	Prostate
Skin - Not Sun Exposed (Suprapubic)	Skin
Skin - Sun Exposed (Lower leg)	Skin
Small Intestine - Terminal Ileum	Small Intestine
Spleen	Spleen
Stomach	Stomach
Testis	Testis
Thyroid	Thyroid
Uterus	Uterus
Vagina	Vagina
Whole Blood	Blood

## Sheet: Curated Expression
	Description	Adipose (average)	Adrenal Gland	Bladder	Whole Blood	Brain (average)	Breast - Mammary Tissue	Cervix (average)	Colon (average)	Esophagus (average)	Fallopian Tube	Heart (average)	Kidney (average)	Liver	Lung	Minor Salivary Gland	Muscle - Skeletal	Ovary	Pancreas	Pituitary	Prostate	Skin (average)	Small Intestine - Terminal Ileum	Spleen	Stomach	Testis	Thyroid	Uterus	Vagina
	Description Curated	Adipose	Adrenal Gland	Bladder	Blood	Brain	Breast	Cervix	Colon	Esophagus	Fallopian Tube	Heart	Kidney	Liver	Lung	Salivary Gland	Skeletal Muscle	Ovary	Pancreas	Pituitary	Prostate	Skin	Small Intestine	Spleen	Stomach	Testis	Thyroid	Uterus	Vagina
G protein	GNAL	4.916	1.13	12.92	1.283	12.8067	4.48	7.45	5.54875	4.786	4.629	1.19875	1.77375	0.6635	3.1745	4.0955	3.777	3.5605	0.67425	18.9	6.916	6.8995	2.734	2.578	1.572	4.768	5.972	7.295	8.619
	GNAS	215.5	230.05	191.9	182.6	304.196	203.8	269.6	179.725	191.25	210.2	184.85	142.125	56.13	224.3	423.85	263.9	236.8	88.205	1324	181.9	119.425	130.5	154.2	125.2	118.2	727.3	253.35	247.65
Cyclase	ADCY1	2.453	0.91525	0.8846	0.01483	23.4633	2.062	4.82975	0.438075	0.6413	3.776	1.3385	1.303	12.905	0.91575	0.303	1.449	1.113	1.1905	3.676	2.03	0.446325	0.3532	2.284	0.8515	3.8	4.039	1.691	1.462
	ADCY2	1.22835	0.5731	2.415	0.01439	19.6476	2.277	4.56575	3.48525	1.96835	5.314	0.153895	0.16915	0.01087	0.47065	1.6995	24.76	4.574	0.1361	10.68	7.319	5.16925	0.7544	0.1517	1.331	4.245	0.6228	6.7625	4.6535
	ADCY3	64.665	8.2485	28.19	2.914	14.4209	56.58	57.3075	16.915	23.595	62.59	8.98175	8.807	1.2675	35.55	15.025	4.782	60.47	4.2045	25.62	27.42	25.9825	23.12	16.72	11	8.023	34.76	58.915	36.29
	ADCY4	69.94	8.6145	27.77	5.068	3.385	71.22	65.815	15.455	22.8	61.95	18.7975	26.2225	2.289	52.01	16.685	8.12	11.58	3.932	8.776	29.54	17.6475	17.75	43.59	12.22	6.628	49.79	71.165	36.965
	ADCY5	19.435	2.623	40.43	0.1024	29.4509	11.91	20.6475	37.91	68.4075	22.6	42.595	9.4485	1.8795	6.918	5.5995	1.706	22.605	3.8765	25.89	29.82	2.62825	9.784	8.713	8.147	16.58	2.993	25.695	8.943
	ADCY6	52.01	23.325	30.24	0.158	14.9341	48.08	56.685	36.9575	25.82	39.64	44.325	27.345	9.0465	33.635	32.06	9.792	55.805	15.68	33.75	38.75	18.5375	32.65	10.93	35.8	12.13	45.43	61.275	31.16
	ADCY7	5.157	2.7295	3.258	10.56	1.14271	3.014	2.9765	3.2045	7.0915	4.541	1.92775	0.7115	0.75195	16.965	4.097	0.5393	16.36	0.80445	2.181	2.181	7.37375	6.976	18.37	2.123	1.211	2.976	2.589	5.9875
	ADCY8	0.012553	0.007284	0	0	5.08869	0.04384	0.0844375	0.004489	0.033815	1.274	0.010115	0.02892	0	0.10455	0.04695	0.02957	0.0090455	0	0.0169	0.01178	1.76025	0.01271	0	0.0134	0.9501	0	0	0.013985
	ADCY9	10.8145	8.3635	17.32	1.047	6.99581	11.44	18.0275	13.305	13.5475	19.33	9.7185	5.787	8.0295	23.03	9.6315	31.12	19.62	8.288	10.14	8.388	9.0295	10.92	6.215	5.405	8.456	37.47	19.075	12.235
	ADCY10	0.1465	0.1243	0.1376	0.05728	0.198273	0.1394	0.15	0.14035	0.10269	0.1719	0.057265	0.161807	1.733	0.1449	0.079505	0.06332	0.11335	0.039475	0.128	0.3021	0.085035	0.1762	0.1316	0.1433	18.15	0.09178	0.12325	0.09302
AKAP	AKAP1	40.385	17.415	64.65	1.876	23.0254	53.49	40.85	94.515	68.685	59.51	43.9525	17.185	27.685	29.81	29.78	73.01	32.57	11.75	27.9	56.54	37.0225	56.89	16.44	51.49	196.2	68.12	46.36	41.45
	AKAP2	98.43	11.945	40.28	1.225	8.35588	75.01	39.6	35.765	24.928	53.7	38.19	19.955	11.225	114.35	16.03	7.619	14.78	3.258	9.423	19.07	19.2975	30.49	33.03	17.96	5.175	51.02	62.505	21.72
	AKAP3	0.4177	0.9751	0.794	0.07917	1.01137	0.6499	0.70835	0.598225	0.58705	0.7763	1.58792	1.4116	0.38165	0.5965	0.80155	0.3357	0.6708	0.9311	2.03	0.9903	0.678825	0.6216	0.6808	0.6263	184.4	1.386	0.65665	0.65875
	AKAP4	0.01236	0.02685	0.02681	0	0.00190615	0	0.04452	0.00769	0.01075	0.05067	0	0.016995	0.01679	0.02971	0.02426	0	0.03428	0.015435	0.02931	0.03386	0	0.01734	0.02203	0.01296	478	0.01645	0.029215	0
	AKAP5	0.46455	0.231	0.7086	0.2688	5.53891	0.4602	0.865925	1.06605	0.62545	0.9439	0.1423	0.6902	0.3349	1.5745	0.38465	0.1365	0.57585	0.1355	1.461	0.6634	0.42525	1.623	1.038	0.3212	0.5483	0.7117	2.1085	0.47385
	AKAP6	0.84295	0.8476	4.95	0.02874	10.4134	0.7885	1.437	3.515	3.7044	3.053	8.712	0.70285	0.3137	1.8415	2.0025	12.79	1.61	0.1372	4.02	0.8967	0.573775	0.7349	0.307	0.4648	2.983	2.208	4.6715	1.0275
	AKAP7	5.812	35.72	7.691	0.853	7.83773	6.104	6.15275	6.61675	3.5805	7.658	2.3395	2.976	7.491	5.488	3.903	4.708	11.205	13.625	4.363	8.136	2.601	5.703	5.823	3.284	8.46	5.863	6.8875	6.67
	AKAP8	34.12	24.025	38.41	9.48	13.3673	37.85	48.225	30.8175	28.385	45.55	11.138	17.1575	12.925	33.165	27.225	21.71	43.85	12.57	28	36.6	37.355	33.79	43.78	22.48	31.1	38.98	48.035	36.42
	AKAP9	12.555	12.635	11.74	1.705	6.67577	15.45	17.0225	13.545	13.335	17.47	4.9915	5.83125	8.1545	16.46	16.65	9.739	25.245	7.9735	20.76	14.58	17.0675	16.93	11.44	12.1	9.736	18.89	17.575	16.755
	AKAP10	18.42	16.295	20.28	9.801	11.2204	18.04	23.1925	16.255	15.88	21.82	5.19125	9.3715	5.389	20.025	13.8	4.971	22.35	5.455	13.66	19.3	15.705	15.53	24.45	13.54	22.54	23.03	23.995	19.79
	AKAP11	17.04	13.71	22.11	1.452	23.3173	17.62	28.7825	16.6125	14.06	24.35	6.1555	6.632	4.0475	17.99	13.31	4.671	23.69	4.7305	20.5	14.9	12.485	15.04	12.91	9.116	21.99	20.86	26.595	19.58
	AKAP12	123.1	11.645	53.53	0.2116	37.5785	78.17	47.095	75.17	30.307	82.84	21.224	21.2175	3.7465	66.18	9.4375	6.761	152.4	2.82	41.64	38.4	12.5875	22.68	21.89	14.19	118.9	43.96	66.145	30.795
	AKAP13	25.96	11.1	32.28	16.05	3.04081	24.28	31.0725	18.6275	22.38	24.62	24.405	7.08625	6.9205	57.585	20.425	18.48	27.82	13.015	18.21	20.23	21.9025	27.22	30.43	18.59	20.9	36.84	71.49	27.95
	AKAP14	0	0	0.04839	0	0.457238	0.0192	0.098105	0.050255	0.01737	1.185	0	0	0	0.71165	0	0	0.05432	0	0.2781	0.05213	0.0129	0.06871	0.02702	0	66.09	0	0.088715	0
	C2orf88	2.1525	3.729	3.568	2.163	3.49138	3.182	16.455	9.6495	2.924	5.456	4.58125	2.57875	0.9379	2.3395	3.674	3.703	2.2265	3.8835	2.654	5.317	2.92825	9.802	2.916	2.795	25.49	3.558	5.083	8.65
	GSKIP	8.345	8.544	10.56	3.42	10.4634	7.984	8.83275	14.9265	17.918	7.586	3.3375	8.371	7.1035	8.3375	10.165	3.254	5.023	4.009	10.71	12.47	14.65	22.12	9.981	9.438	26.8	8.289	8.676	17.855
	SPHKAP	0.01157	0.012045	0.04307	0	14.081	0.04536	0.05701	0.101365	0.067973	0.07007	9.7635	0.0119413	0.003665	0.069615	0.009304	0.007279	1.1745	0.0083035	0.0607	0.02378	0.0588325	0.02865	0.2392	0.02863	0.4456	0.06089	0.01453	0.07149
PDE	PDE4A	17.98	6.297	14.04	5.289	16.4667	14.34	22.8275	13.425	7.61	14.29	5.7445	5.63475	1.237	21.83	13.175	12.19	1.698	6.663	5.876	13.56	6.67	9.078	11.61	13.7	32.62	20.41	15.825	12.74
	PDE4B	11.375	1.427	3.741	5.667	14.9115	12.1	5.5435	3.23875	2.347	3.562	5.351	2.684	1.2435	13.81	8.9045	7.344	1.46	0.39855	2.547	11.72	5.9055	8.016	14.8	1.882	3.233	7.313	2.801	4.159
	PDE4C	1.0465	0.31015	1.307	0.02813	1.2956	0.6001	3.45175	5.04475	1.7355	4.828	1.13	2.57125	0.4474	3.762	0.31995	1.164	1.798	0.3145	3.302	2.134	0.2817	2.45	2.299	4.056	3.791	1.533	3.431	1.5335
	PDE4D	4.69	0.43005	12.52	2.542	2.28665	3.496	4.008	11.563	3.961	4.608	4.283	3.2725	0.47115	11.025	3.3105	23.09	1.2365	0.38575	5.604	11.19	2.476	4.547	2.392	3.972	1.357	4.957	5.3185	5.8415
	PDE8B	16.19	1.8985	4.041	0.175	13.9335	8.936	22.6225	4.11175	1.9465	27.94	6.97312	5.912	0.93495	6.7955	9.276	0.482	4.3895	2.653	13.92	18.15	2.32175	2.361	1.131	2.808	4.23	110.5	32.88	6.076
	PDE11A	0.172095	0.18205	0.06205	0	0.622292	0.6195	1.0124	0.365325	0.024427	0.1609	0.082565	0.3362	1.4335	0.021945	0.5223	1.524	0.1925	0.58715	1.575	4.567	0.12301	0.2663	0.022	0.08815	1.753	1.097	0.41925	0.07572
Catalytic	PRKACA	70.67	120	68.31	70.14	55.8581	64.89	76.9375	57.9125	59.975	84.31	104.6	27.1375	38.08	63.755	41.5	142.3	143.55	15.905	97.87	56.42	46.47	37.04	92.18	30.02	90.72	62.53	83.87	58.64
	PRKACB	9.698	8.318	24.32	3.792	66.745	9.68	17.14	21.7725	11.86	16.13	5.994	7.19275	3.6435	8.6875	16.015	2.376	10.78	3.5905	29.71	14.89	3.553	14.64	16.74	17.61	5.107	11.99	17.65	10.075
	PRKACG	0	0	0	0	0.00464	0	0	0	0	0	0	0	0	0	0	0	0	0	0	0	0	0	0	0	59.85	0	0	0
	PRKX	7.898	1.306	4.73	4.107	4.24558	8.316	8.98475	5.506	11.9215	11.64	1.98175	13.9275	1.1865	17.13	9.9875	1.074	8.5375	2.6335	3.422	7.508	13.56	9.193	16.69	3.806	13.81	52.62	6.595	24.245
Regulatory	PRKAR1A	125.75	94.375	96.58	38.06	80.4908	113.5	124.95	68.2475	75.945	118.1	104.757	53.69	36.635	121.2	77.82	103.1	151.55	19.255	105.2	77.65	71.68	52.7	71.42	50.07	86.31	116.2	138.35	95.39
	PRKAR1B	11	5.8735	11.38	2.924	119.947	13.51	24.5375	16.78	13.78	20.38	7.25775	10.2345	5.0615	14.435	6.5485	1.961	36.29	2.331	41.79	14.46	7.71475	11.36	23.93	8.061	18.58	11.32	32.835	14.39
	PRKAR2A	20.175	22.42	22.48	6.937	7.52285	19.19	19.415	20.47	21.985	23.68	11.0425	9.53875	9.1215	19.09	16.42	48.22	19.67	7.0735	13.98	19	19.625	16.44	11.99	13.96	46.6	19.58	21.69	21.17
	PRKAR2B	95.96	56.02	38.93	4.91	20.5753	49.11	18.17	14.72	31.3025	14.17	9.28975	5.86575	1.179	13.98	13.785	0.8729	51.325	3.551	20.72	14.92	4.46325	14.33	20.23	8.717	30.36	6.245	17.765	9.4225

## Sheet: Notes
Median gene-level TPM by tissue file was downloaded from Gtex Portal [https://www.gtexportal.org/home/datasets], v8 as of June 2017
For organs with multiple data entries (i.e. Brain - Amygdala, Brain - Anterior cingulate cortex,…) values were averaged to represent whole organ expression
All values are noted in transcripts per million (TPM)
